# Supplementary material
Source: publisher site journal article supplement (https://www.dovepress.com/article/200213)
Supplement: Supplementary file 1 [file get_supplementary_file.php]

## Supplementary materials

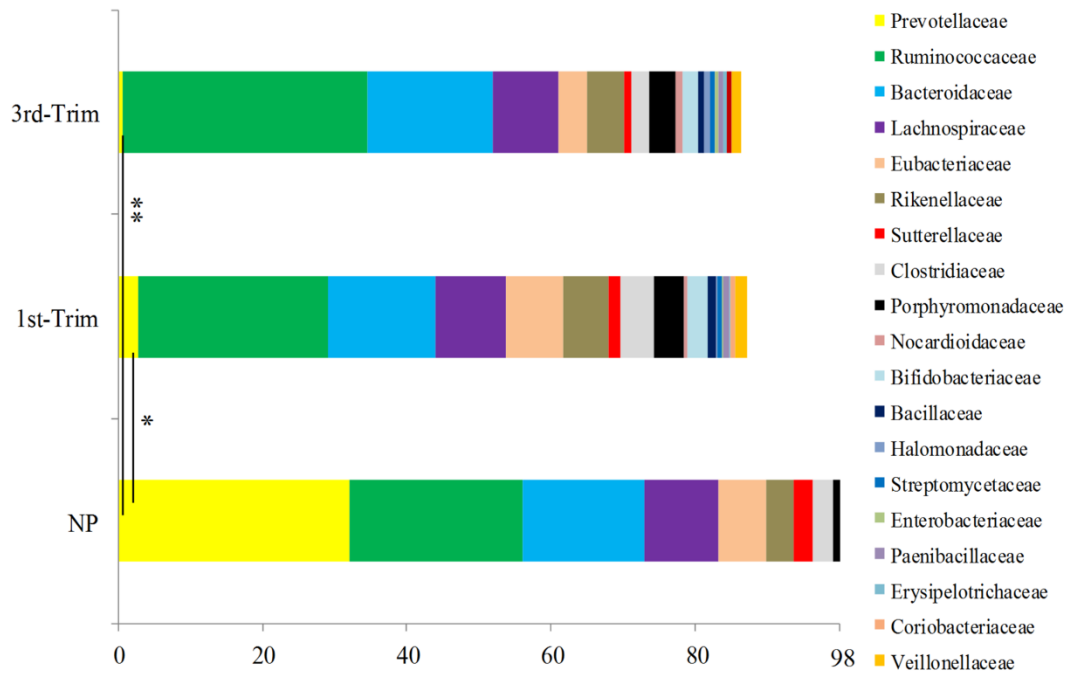

**Figure S1** Average relative abundance of detected major families in 16S amplicon sequencing data. The x-axis indicates the average relative abundance as percentages, and the y-axis represents the group name. Kruskal–Wallis was performed for determining significant changes. \*Significant at  $p < 0.05$ . \*\* Highly significant at  $p \leq 0.01$ . NP, non-pregnant group; 1<sup>st</sup>-Trim, first trimester; 3<sup>rd</sup>-Trim, third trimester.

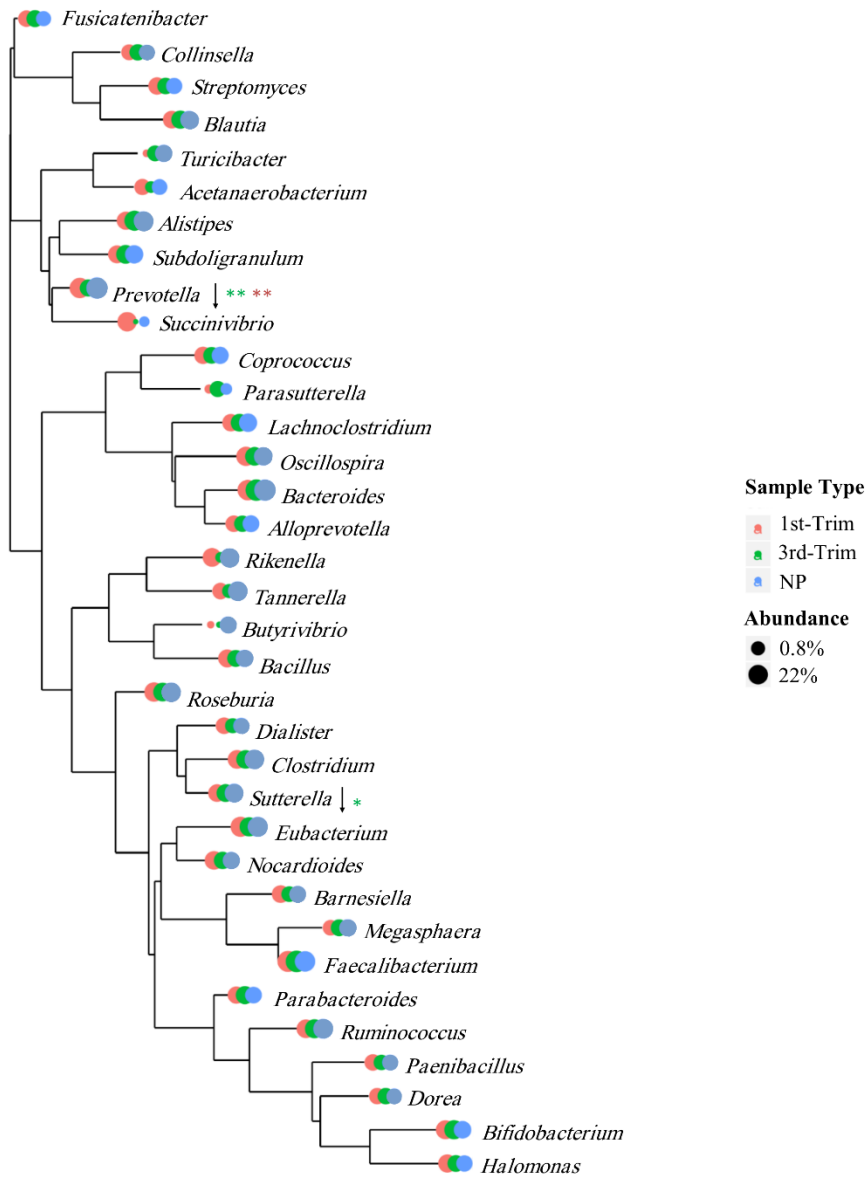

**Figure S2** Annotated phylogenetic tree representation of dominant genera. Dots are showing genera relative abundance. The cutoff point for genera abundance was set 0.5%. \*Indicates significant at  $p < 0.05$ . The arrow direction is indicating decrease (↓) or increase (↑) in OTUs abundance. Kruskal–Wallis was performed for determining significant changes. \*Significant at  $p < 0.05$ . \*\* Highly significant at  $p \leq 0.01$ . Abbreviations are as described for Figure S1.

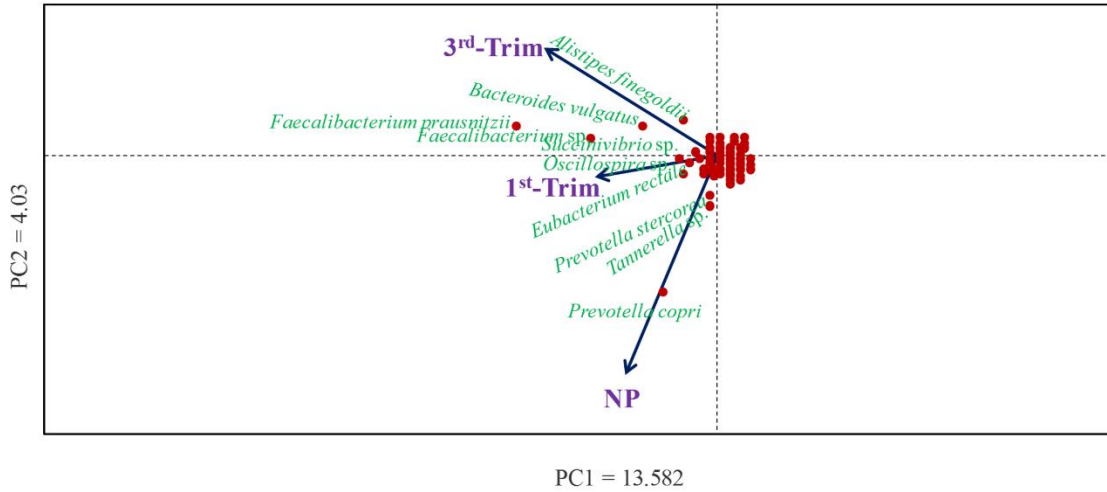

**Figure S3** The multivariate principal coordinate analysis of the studied groups using type-1 scaling. The vectors are representing groups and their direction is showing variability. Dots are showing relative position of each species. Abbreviations are as described for Figure S1.

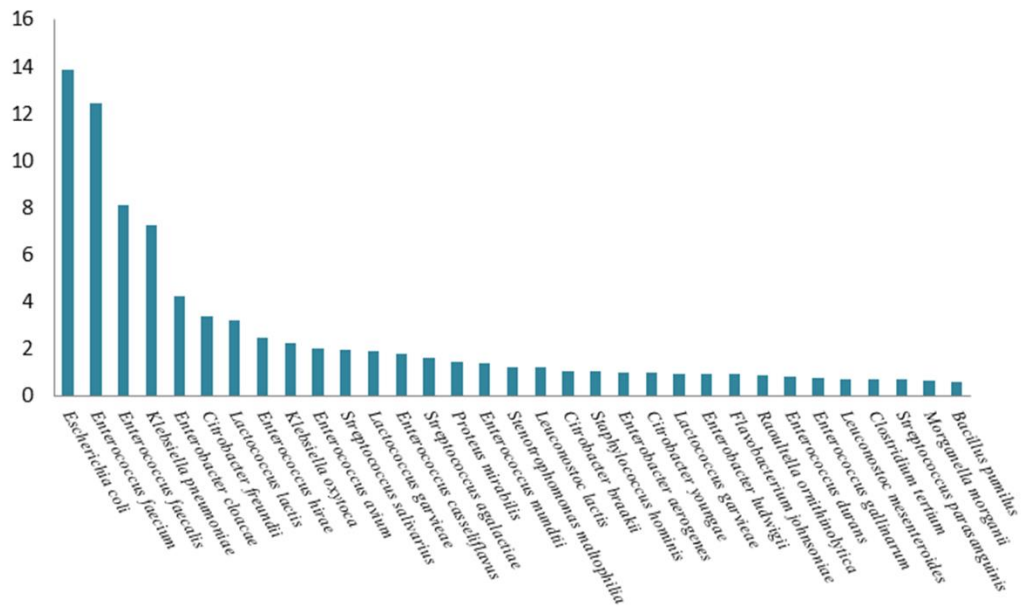

**Figure S4** Average percentage abundance of dominant bacterial species (abundance  $\geq 0.6\%$ ) identified through culturomics.

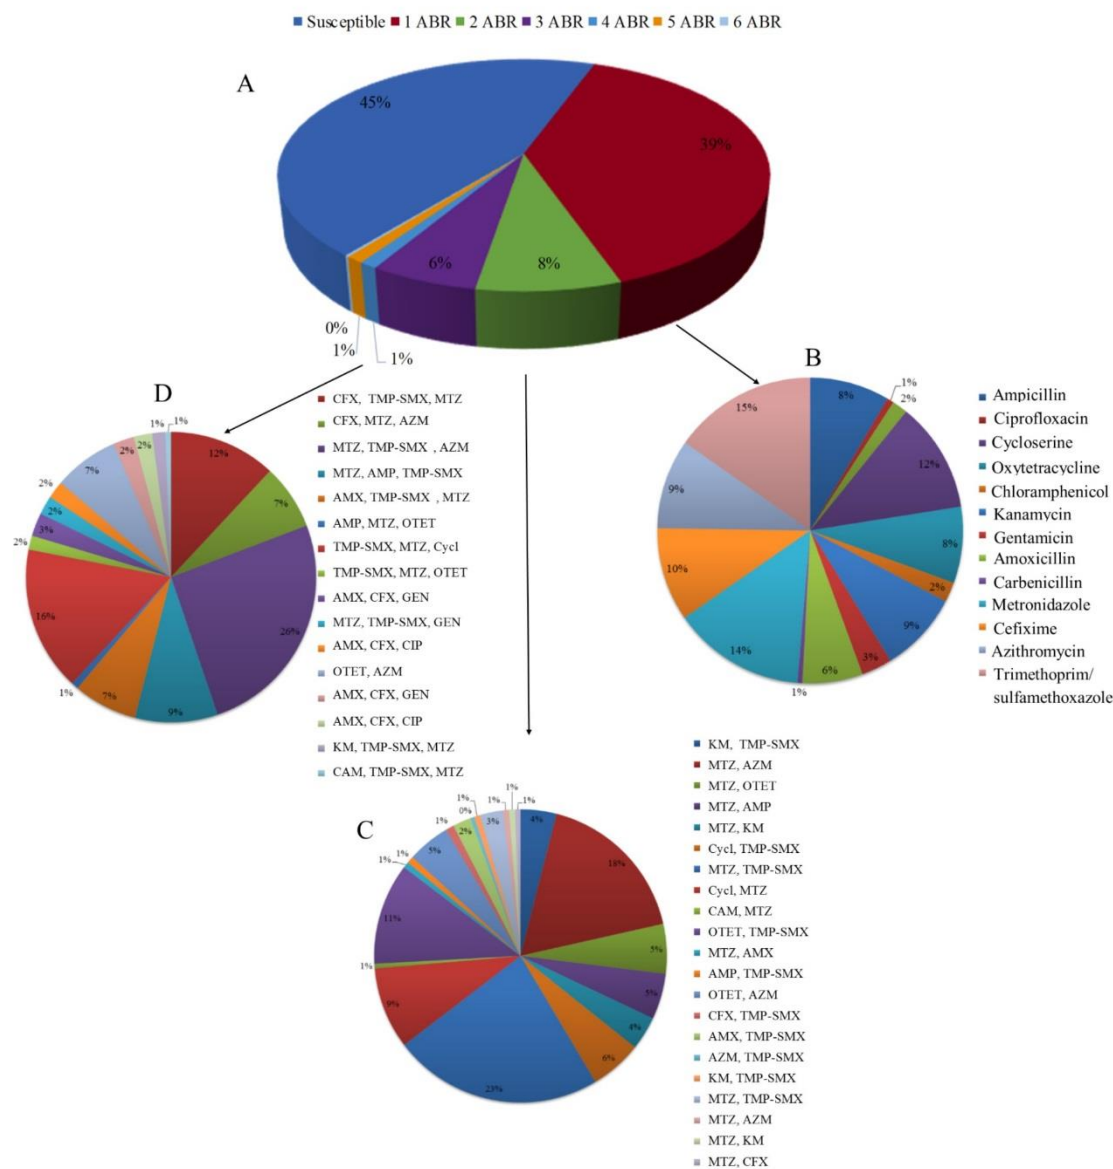

**Figure S5** Percentage presentation of total resistant isolates. (A) Relative percentage abundance of total isolates resistant to single and multiple antibiotics. (B) Relative percentage abundance of isolates resistant to single antibiotic. (C) Relative percentage abundance of isolates resistant to two antibiotics. (D) Relative percentage abundance of isolates resistant to three antibiotics. Abbreviations: TMP-SMX, trimethoprim/sulfamethoxazole; MTZ, metronidazole; AZM, azithromycin; OTET, oxytetracycline; AMP, ampicillin; KM, kanamycin; Cyclo, cycloserine; CAM, chloramphenicol; AMX, amoxicillin; CFX, cefixime; GEN, gentamicin; CIP, ciprofloxacin.

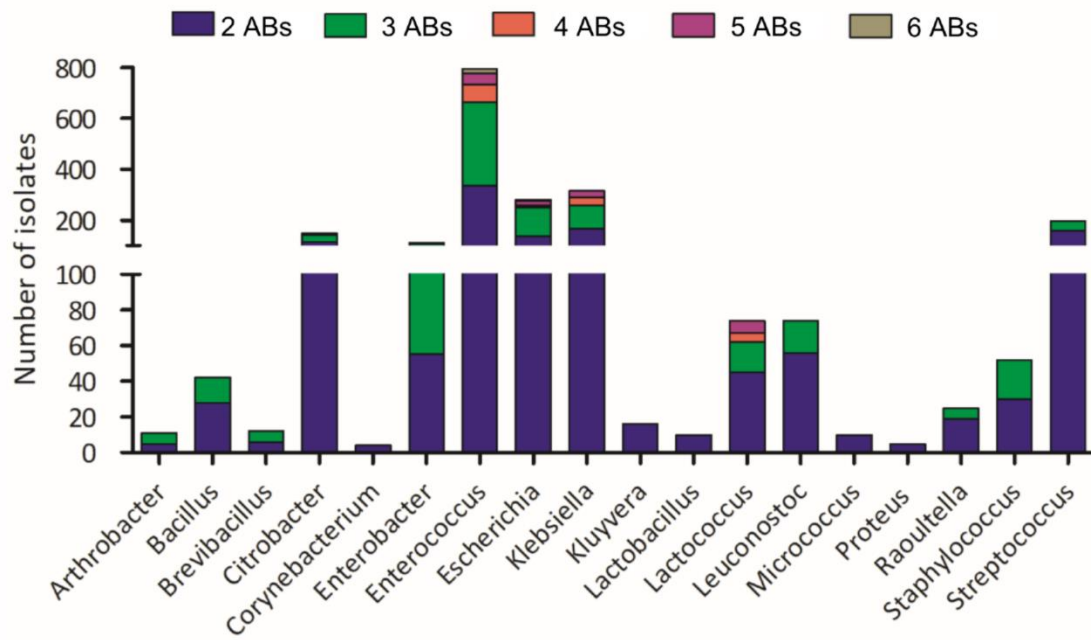

**Figure S6** Relative abundance of multiple- antibiotics resistant genera. Number of isolates are showing on Y-axis.

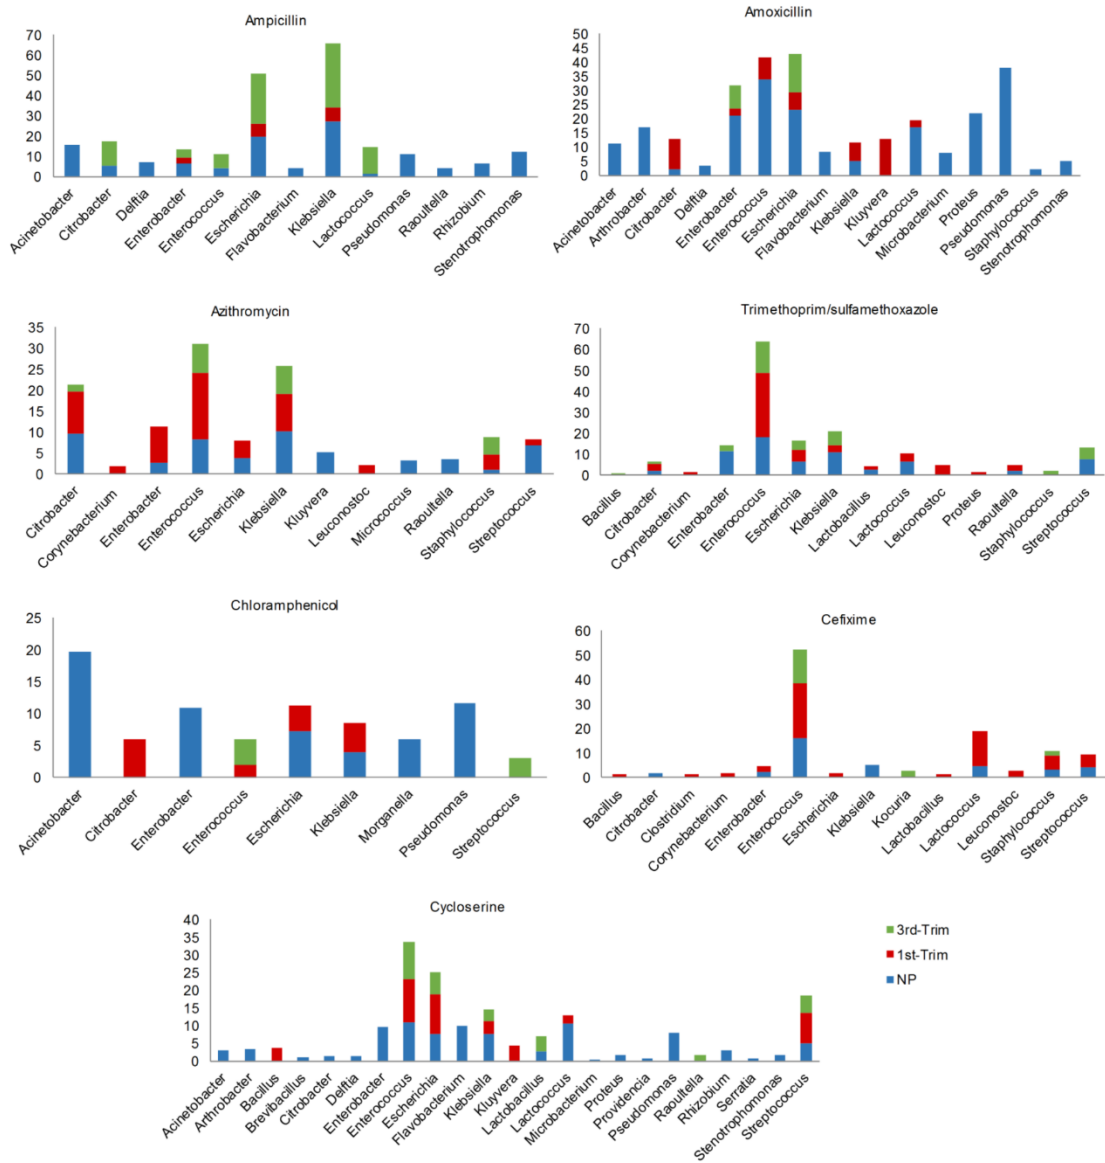

**Figure S7** Comparison of the bacterial genera between non-pregnant and pregnant groups that showed resistant toward ampicillin, amoxicillin, azithromycin, trimethoprim/sulfamethoxazole, chloramphenicol, cefixime, and cycloserine. Average abundance of genera is showing on Y-axis.

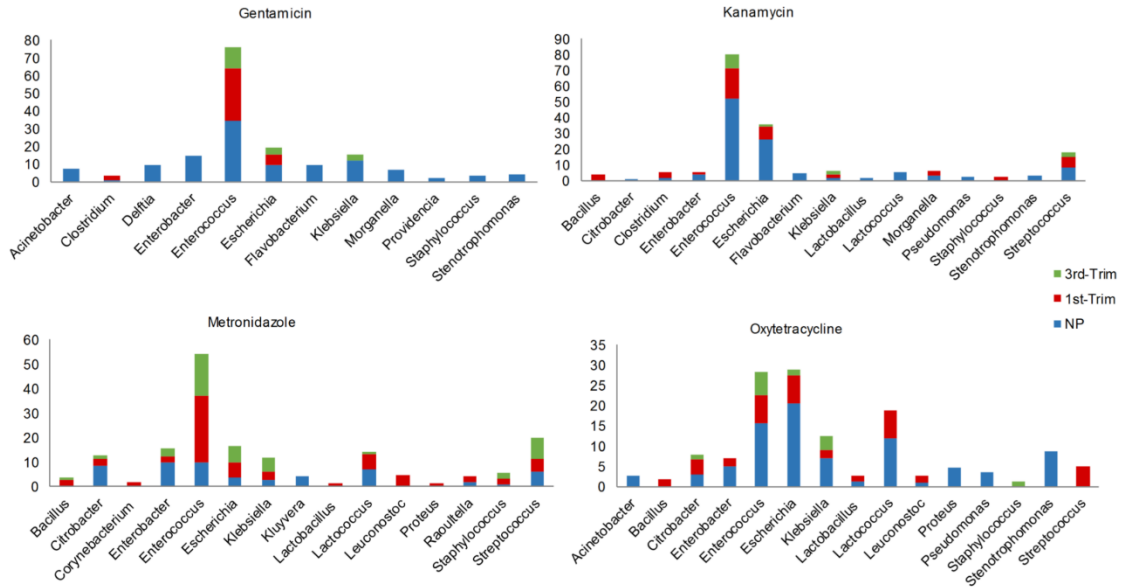

**Figure S8** Comparison of the bacterial genera between non-pregnant and pregnant individuals that showed resistant toward gentamicin, kanamycin, metronidazole, and oxytetracycline. Average abundance of genera is showing on y-axis.



**Table S1** Composition of media used for culturomic analysis

| <b>Ingredients</b>             | <b>Concentration</b> |
|--------------------------------|----------------------|
| Acid hydrolysate of casein     | 0.24 g/L             |
| Yeast extract                  | 0.24 g/L             |
| Dextrose                       | 0.87 g/L             |
| Soluble starch                 | 0.24 g/L             |
| Dipotassium phosphate          | 1.42 g/L             |
| Magnesium sulfate heptahydrate | 0.024 g/L            |
| Sodium pyruvate                | 0.14 g/L             |
| Calf brain                     | 30.76 g/L            |
| Beef heart                     | 38.4 g/L             |
| Proteose peptone               | 2.16 g/L             |
| Sodium chloride                | 1.58 g/L             |
| Disodium phosphate             | 0.43 g/L             |
| Pancreatic digest of casein    | 1.7 g/L              |
| Papaic digest of soyabean meal | 0.3 g/L              |
| Ascorbic acid                  | 1g/L                 |
| Blood                          | 5%                   |
| Agar                           | 13 g/L               |

**Table S2** List of primer sequence used for the amplification of antimicrobial resistant gene from the genomic DNA of the studied stool samples

| Primer Name             | Sequence/gene               | Size (bp) | Annealing Temp. (°C) | Reference |
|-------------------------|-----------------------------|-----------|----------------------|-----------|
| <i>emeA</i> -F          | GTGACAGCCTTTGTGGCAGAT       | 687       | 57                   | 1         |
| <i>emeA</i> --R         | TAGTCCGTTGATGGTTCCTTG       |           |                      |           |
| <i>aac6-aph2</i> -F     | CCAAGAGCAATAAGGGCATA        | 220       | 55                   |           |
| <i>aac6-aph2</i> -R     | CACTATCATAACCACTACCG        |           |                      |           |
| <i>aph3-II</i> -F       | GCCGATGTGGATTGCGAAAA        | 292       | 55                   |           |
| <i>aph3-II</i> -R       | GCTTGATCCCCAGTAAGTCA        |           |                      |           |
| <i>ant6-I</i> -F        | ACTGGCTTAATCAATTTGGG        | 597       | 55                   |           |
| <i>ant6-I</i> -R        | GCCTTCCGCCACCTCACC          |           |                      |           |
| <i>gyrA faecium</i> -F  | CGGGATGAACGAATTGGGTGTGA     | 240       | 58                   | 2         |
| <i>gyrA faecium</i> -R  | AATTTTACTCATACGTGCTTCGG     |           |                      |           |
| <i>gyrA faecalis</i> -F | CGGGATGAACGAATTGGGTGTGA     | 241       | 55                   |           |
| <i>gyrA faecalis</i> -R | AATTTTACTCATACGTGCTTCGG     |           |                      |           |
| <i>parC faecium</i> -F  | TTCCCGTGCATTTTCGATCAGTACTTC | 151       | 58                   | 3         |
| <i>parC faecium</i> -R  | CGTATGACAAAGGATTCGGTAAATC   |           |                      |           |
| <i>parC faecalis</i> -F | AATGAATAAAGACGGCAATA        | 191       | 48.7                 |           |
| <i>parC faecalis</i> -R | CGCCATCCATACTTCCGTTG        |           |                      |           |
| <i>vanA</i> -F          | GGGAAAACGACAATTGC           | 1030      | 48.7                 | 4         |
| <i>vanA</i> -R          | GTACAATGCGGCCGTTA           |           |                      |           |
| <i>vanB</i> -F          | ATGGGAAGCCGATAGTC           | 433       | 54                   |           |
| <i>vanB</i> -R          | GATTTTCGTTCTCGACC           |           |                      |           |
| <i>vanR</i> -F          | AGCGATAAAATACTTATTGTGGA     | 645       | 62                   |           |
| <i>vanR</i> -R          | CGGATTATCAATGGTGTGCGTT      |           |                      |           |
| <i>vanS</i> -F          | AACGACTATTCCAACTAGAAC       | 1094      | 60                   |           |
| <i>vanS</i> -R          | GCTGGAAGCTCTACCCTAAA        |           |                      |           |
| <i>vanH</i> -F          | ATCGGCATTACTGTTTATGGAT      | 943       | 60                   |           |
| <i>vanH</i> -R          | TCCTTTCAAATCCAAACAGTTT      |           |                      |           |
| <i>vanY</i> -F          | ACTTAGGTTATGACTACGTTAAT     | 866       | 55                   |           |
| <i>vanY</i> -R          | CCTCCTTGAATTAGTATGTGTT      |           |                      |           |
| <i>vanC2/C3</i> -F      | 5'-CGGGGAAGATGGCAGTAT-3'    | 484       | 54                   |           |
| <i>vanC2/C3</i> -R      | 5'-CGCAGGGACGGTGATTTT-3'    |           |                      |           |
| <i>orf-1A</i> -F        | AGGGCGACATATGGTGTAAACA      | 844       | 58                   | 4         |
| <i>orf-1A</i> -R        | GGGCGACGGTACAACATCTT        |           |                      |           |
| <i>orf-1B</i> -F        | TGGTGGCTCCTTTTCCAGTTC       | 1007      | 60                   |           |
| <i>orf-1B</i> -R        | CGTCCTGCCGACTATGATTATTT     |           |                      |           |
| <i>orf-1C</i> -F        | ACCGTTTTTGCAGTAAGTCTAAAT    | 1066      | 60                   |           |
| <i>orf-1C</i> -R        | AAACGGGATTTAGAAATAGTTAAT    |           |                      |           |
| <i>orf-1D</i> -F        | CCATTTCTGTATTTTCAATTTATTA   | 925       | 58                   |           |

|                                                  |                                   |      |      |   |
|--------------------------------------------------|-----------------------------------|------|------|---|
| <i>orf</i> -1D-R                                 | CATAGTTATCACCCCTTTCACATA          |      |      |   |
| <i>orf</i> -1E-F                                 | TTGCGGAAAATCGGTTATATTC            | 540  | 56   |   |
| <i>orf</i> -1E-R                                 | AGCCCTAGATACATTAGTAATT            |      |      |   |
| <i>bla</i> <sub>SHV</sub> -F                     | CTTTATCGG CCCTCACTCAA             | 327  | 48.5 | 5 |
| <i>bla</i> <sub>SHV</sub> -R                     | AGGTGCTCATCATGGGAAAG              |      |      |   |
| <i>bla</i> <sub>TEM</sub> -F                     | KACAATAACCCTGRATAATGC             | 940  | 48.5 |   |
| <i>bla</i> <sub>TEM</sub> -R                     | AGTATATATGAGTAACTTGG              |      |      |   |
| <i>bla</i> <sub>CTXM</sub> -F                    | ATGTGCAGYACCAGTAARGTKATGGC        | 593  | 48.5 |   |
| <i>bla</i> <sub>CTXM</sub> -R                    | TGGGTRAARTARGTSACCAGAAYCAGC<br>GG |      |      |   |
| <i>bla</i> <sub>OXA-51</sub> -F                  | TAATGCTTTGATCGGCCTTG              | 353  | 52   | 6 |
| <i>bla</i> <sub>OXA-51</sub> -R                  | TGGATTGCACTTCATCTTGG              |      |      |   |
| <i>bla</i> <sub>OXA-23</sub> -F                  | GATCGGATTGGAGAACCAGA              | 501  | 52   |   |
| <i>bla</i> <sub>OXA-23</sub> -R                  | ATTTCTGACCGCATTTCAT               |      |      |   |
| <i>bla</i> <sub>OXA-24</sub> -F                  | GGTTAGTTGGCCCCCTTAAA              | 240  | 52   |   |
| <i>bla</i> <sub>OXA-24</sub> -R                  | AGTTGAGCGAAAAGGGGATT              |      |      |   |
| <i>bla</i> <sub>OXA-58</sub> -F                  | AAGTATTGGGGCTTGTGCTG              | 590  | 52   |   |
| <i>bla</i> <sub>OXA-58</sub> -R                  | CCCCTCTGCGCTCTACATAC              |      |      |   |
| <i>bla</i> <sub>OXA-143</sub> -F                 | TGGCACTTTCAGCAGTTCCT              | 149  | 52   |   |
| <i>bla</i> <sub>OXA-143</sub> -R                 | TAATCTTGAGGGGGCCAACC              |      |      |   |
| IS <i>Aba</i> / <i>bla</i> <sub>OXA-23</sub> -F  | AGAGCATTACCATATAGATT              | 327  | 41   |   |
| IS <i>Aba</i> / <i>bla</i> <sub>OXA-23</sub> -R  | CACAATTTCTGATAAAGATA              |      |      |   |
| IS <i>Aba</i> / <i>bla</i> <sub>OXA-51</sub> -F  | AAGCATGATGAGCGCAAAG               | 227  | 52   |   |
| IS <i>Aba</i> / <i>bla</i> <sub>OXA-51</sub> -R  | GGTGAGCAGGCTGAAATAAAA             |      |      |   |
| IS <i>Aba</i> 4/ <i>bla</i> <sub>OXA-23</sub> -F | CACAATTTCTGATAAAGATA              | 327  | 41   |   |
| IS <i>Aba</i> 4/ <i>bla</i> <sub>OXA-23</sub> -R | TTTATTAATTATGCTGAAC               |      |      |   |
| <i>bla</i> <sub>ACT</sub> -F                     | ATTCGTATGCTGGATCTCGCCACC          | 396  | 50   | 7 |
| <i>bla</i> <sub>ACT</sub> -R                     | CATGACCCAGTTCGCCATATCCTG          |      |      |   |
| <i>bla</i> <sub>FOX</sub> -F                     | CACCACGAGAATAACC                  | 1184 | 50   |   |
| <i>bla</i> <sub>FOX</sub> -R                     | GCCTTGAACCTCGACCG                 |      |      |   |
| <i>bla</i> <sub>IMI</sub> -F                     | ATGTCATTAGGTGATATGGC              | 879  | 50   |   |
| <i>bla</i> <sub>IMI</sub> -R                     | GCATAATCATTGCGGTACC               |      |      |   |
| <i>bla</i> <sub>CMY-G1</sub> -F                  | GCTGACAGCCTCTTCTCCAC              | 1082 | 56   |   |
| <i>bla</i> <sub>CMY-G1</sub> -R                  | CCTCGACACGGRCAGGGTTA              |      |      |   |
| <i>bla</i> <sub>CMY-G2</sub> -F                  | GGTCTGGCCCATGCAGGTGA              | 963  | 56   |   |

|                                              |                               |     |    |    |
|----------------------------------------------|-------------------------------|-----|----|----|
| <i>bla</i> <sub>CMY-G2</sub> -R              | GGTCGAGCCGGTCTTGTGGA          |     |    |    |
| <i>tet</i> (A)-F                             | F: GCT ACA TCC TGC TTG CCT TC | 210 | 55 | 1  |
| <i>tet</i> (A)-R                             | R: CAT AGA TCG CCG TGA AGA GG |     |    |    |
| <i>ermB</i> -F                               | F: GAT ACC GTT TAC GAA ATT GG | 364 | 58 |    |
| <i>ermB</i> -R                               | R: GAA TCG AGA CTT GAG TGT GC |     |    |    |
| <i>StrA</i> -F                               | TTGATGTGGTGTCCCGCAATGC        | 383 | 57 | 8  |
| <i>StrA</i> -R                               | CCAATCGCAGATAGAAGGCAA         |     |    |    |
| <i>StrB</i> -F                               | CCGCGATAGCTAGATCGCGTT         | 470 | 59 | 9  |
| <i>StrB</i> -R                               | CGACTACCAGGCGACCGAAAT         |     |    |    |
| <i>cmlA</i> -F                               | CCGCCACGGTGTGTTATC            | 698 | 55 | 10 |
| <i>cmlA</i> -R                               | CACCTTGCCCTGCCCATCATTAG       |     |    |    |
| <i>catA1</i> -F                              | AGTTGCTCAATGTACVTATAACC       | 547 | 55 |    |
| <i>catA1</i> -R                              | TTGTAATTCATTAAGCATTCTGCC      |     |    |    |
| <i>bla</i> <sub>DHA</sub> -F                 | AACTTTACAGGTGTGCTGGGT         | 405 | 60 | 7  |
| <i>bla</i> <sub>DHA</sub> -R                 | CCGTACGCATACTGGCTTTGC         |     |    |    |
| <i>bla</i> <sub>GES</sub> -F                 | ATGCGCTTCATTCACGCAC           | 591 | 56 |    |
| <i>bla</i> <sub>GES</sub> -R                 | CTATTTGTCCGTGCTCAGG           |     |    |    |
| <i>bla</i> <sub>ADC</sub> -F                 | CCGCGACAGCAGGTGGATA           | 420 | 60 | 11 |
| <i>bla</i> <sub>ADC</sub> -R                 | TCGGCTGATTTTCTTGGTT           |     |    |    |
| IS <i>Aba</i> / <i>bla</i> <sub>ADC</sub> -F | CATTGGCATTAACTGAGGAGAAA       | 451 | 55 |    |
| IS <i>Aba</i> / <i>bla</i> <sub>ADC</sub> -R | TTGGAAATGGGGAAAACGAA          |     |    |    |
| IS <i>Adc</i> / <i>bla</i> <sub>ADC</sub> -F | GTTGCACTTGGTCAATGAAAA         | 751 | 60 |    |
| IS <i>Adc</i> / <i>bla</i> <sub>ADC</sub> -R | ACGTCGCGAGTTGAAGTAAGTT        |     |    |    |

## References

1. Jia W, Li G, Wang W. Prevalence and antimicrobial resistance of *Enterococcus* species: a hospital-based study in China. *Int J Environ Res Public Health*. 2014;11:3424-3442.
2. Petersen A, Jensen LB. Analysis of *gyrA* and *parC* mutations in enterococci from environmental samples with reduced susceptibility to ciprofloxacin. *FEMS Microbiol Lett*. 2014;231:73-76.
3. Lopez M, Tenorio C, Del Campo R, Zarazaga M, Torres C. Characterization of the mechanisms of fluoroquinolone resistance in vancomycin-resistant enterococci of different origins. *J Chemother*. 2011;23:87-91.

4. Miele A, Bandera M, Goldstein, BP. Use of primers selective for vancomycin resistance genes to determine van genotype in enterococci and to study gene organization in *vanA* isolates. *Antimicrob Agents Chemother*. 1995;39:1772-1778.
5. Dandachi I, Salem Sokhn E, Najem E, Azar E, Daoud Z. Carriage of beta-lactamase-producing Enterobacteriaceae among nursing home residents in north Lebanon. *Int J Infect Dis*. 2016;45:24-31.
6. Bahador A, Raoofian R, Pourakbari B, Taheri M, et al. Genotypic and antimicrobial susceptibility of carbapenem-resistant *Acinetobacter baumannii*: analysis of *isAba* elements and *blaOXA-23*-like genes including a new variant. *Front Microbiol*. 2015;6:1249.
7. Du J, Li P, Liu H, Lu D, Liang H, Dou Y. Phenotypic and molecular characterization of multidrug resistant *Klebsiella pneumoniae* isolated from a university teaching hospital, China. *PLoS One*. 2014;9:e95181.
8. Hochhut B, Lotfi Y, Mazel D, Faruque SM, Woodgate R, Waldor MK. Molecular analysis of antibiotic resistance gene clusters in *Vibrio cholerae* O139 and O1 SXT constins. *Antimicrob Agents Chemother*. 2001;45:2991-3000.
9. Kumar P, Wilson PA, Bhai R, Thomas S. Characterization of an SXT variant *Vibrio cholerae* O1 Ogawa isolated from a patient in Trivandrum, India. *FEMS Microbiol Lett*. 2009;303:132-136.
10. Keyes K, Hudson C, Maurer JJ, Thayer S, White DG, Lee MD. Detection of florfenicol resistance genes in *Escherichia coli* isolated from sick chickens. *Antimicrob Agents Chemother*. 2000;44:421-424.
11. Ruiz M, Marti S, Fernandez-Cuenca F, Pascual A, Vila J. Prevalence of IS(Aba1) in epidemiologically unrelated *Acinetobacter baumannii* clinical isolates. *FEMS Microbiol Lett*. 2007;274:63-66.
